# Supplementary material for: The Hulong hybrid grouper (Epinephelus fuscoguttatus♀×Epinephelus lanceolatus♂) has invaded the coastal waters of Hainan Island, China
Source: Frontiers journal article supplement (doi:10.3389/fmars.2024.1438895), 2024-11-21
Supplement: Table_1.DOCX [file Table_1.DOCX]

1. In which year did you start breeding/cultivating Hulong hybrid groupers?

( )

2. In which city/county did you first breed/cultivate Hulong hybrid groupers?

( )

3. How long do Hulong hybrid groupers usually cultured in your company?

( )

4. What is the market size of Hulong hybrid groupers in your company?

( )

5 Have you ever raised Hulong hybrid groupers to sexual maturity?

( )

6. Under aquacultured conditions, when do female Hulong hybrid groupers mature? What is the approximate weight at maturity?

( )

7. Under farming conditions, when do male Hulong hybrid groupers mature? What is the approximate weight at maturity?

( )

8. Have there been any instances of Hulong hybrid groupers escaping from your company?

( )

9. Have you ever discarded Hulong hybrid grouper fertilized eggs/juveniles in your company?

( )
